# Supplementary material
Source: Royal Society of Chemistry journal article supplement (doi:10.1039/d6nr00884d)
Supplement: d6nr00884d1.pdf [file d6nr00884d1.pdf]

## High-Performance Broadband Organic Photodetectors via Water-Transfer Printing with Biomedical Monitoring Capability

Jiahui Ding,<sup>ac</sup> Jiangnan Xia,<sup>b</sup> Hong Lian,<sup>\*acd</sup> Xinwei Liu,<sup>ac</sup> Guotao Lan,<sup>ac</sup> Jiangcheng Cao,<sup>ac</sup> Shihui Dong,<sup>ac</sup> Hesheng Liu,<sup>b\*</sup> Qingchen Dong<sup>\*ac</sup>

<sup>a</sup>MOE Key Laboratory of Advanced Display and System Applications, Shanghai University, No.149 Yanchang Road, Jingan District, Shanghai 200072, China.

<sup>b</sup>School of Information Engineering, Xinyu University, No. 2666, Yangguang Avenue, High-tech Zone, Xinyu, Jiangxi 338000, China.

<sup>c</sup>School of Mechanical & Electronic Engineering and Automation, Shanghai University, No.99 Shangda Road, Baoshan District, Shanghai 200444, China.

<sup>d</sup>Department of Applied Physics, Hong Kong Polytechnic University, Hong Kong, Hong Kong SAR, 999077 China.

E-mail: [honglian@shu.edu.cn](mailto:honglian@shu.edu.cn); [1649301452@qq.com](mailto:1649301452@qq.com); [qcdong@shu.edu.cn](mailto:qcdong@shu.edu.cn)

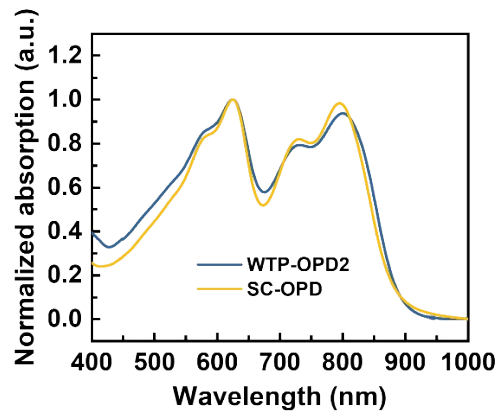

**Figure S1.** The absorption spectra of WTP-OPD2 and SC-OPD.

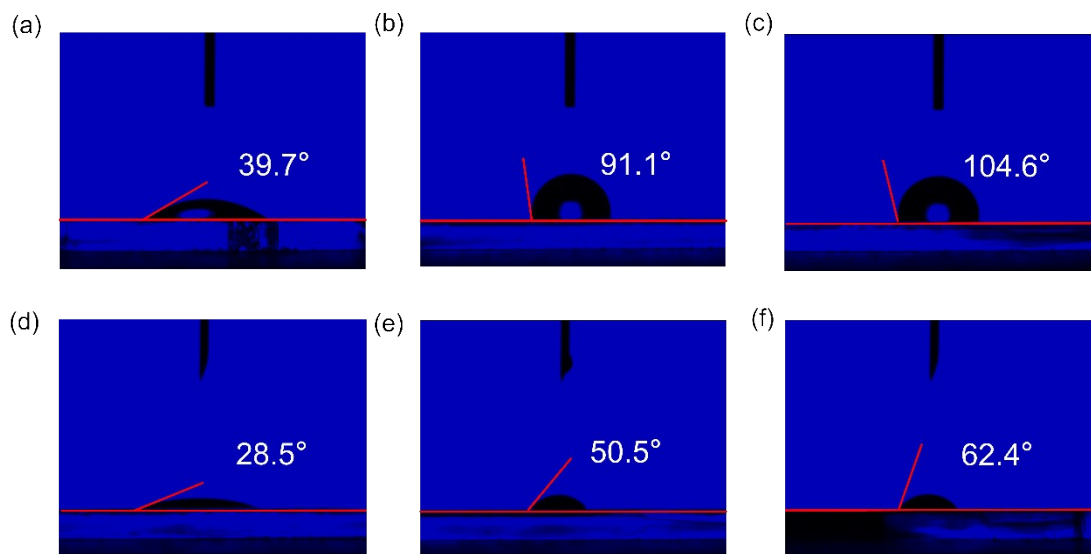

**Figure S2.** Contact angle measurements of water and diiodomethane on various films. Profiles of water (a, b, c) and diiodomethane (d, e, f) droplets on CuSCN, WTP-PM6:L8-BO and SC-PM6:L8-BO, respectively.

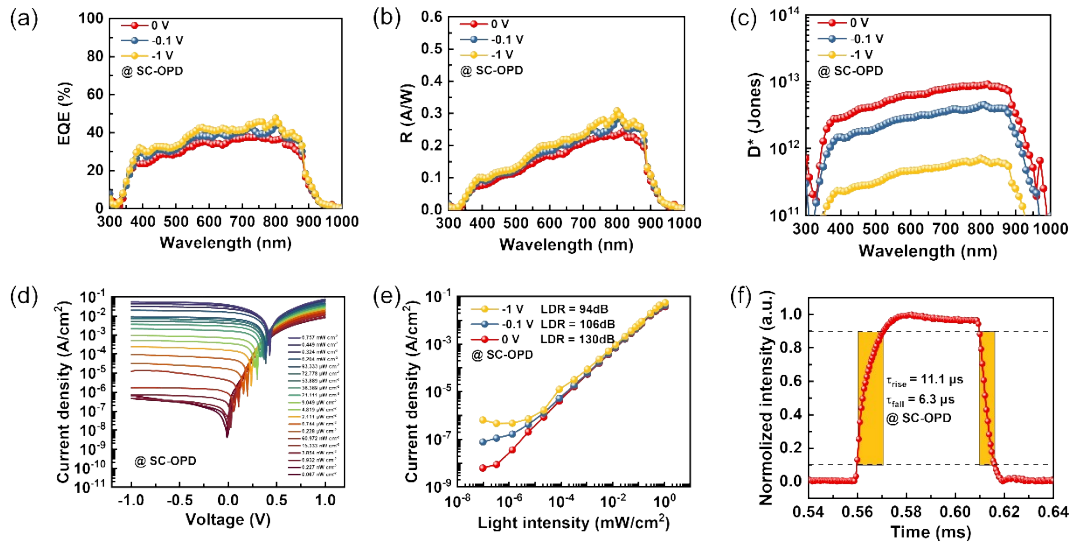

**Figure S3.** Performance of SC-OPD. (a) EQE; (b) R; (c)  $D^*$ ; (d)  $J_{ph}$  under different light intensities; (e) Linearity; (f) Response time.

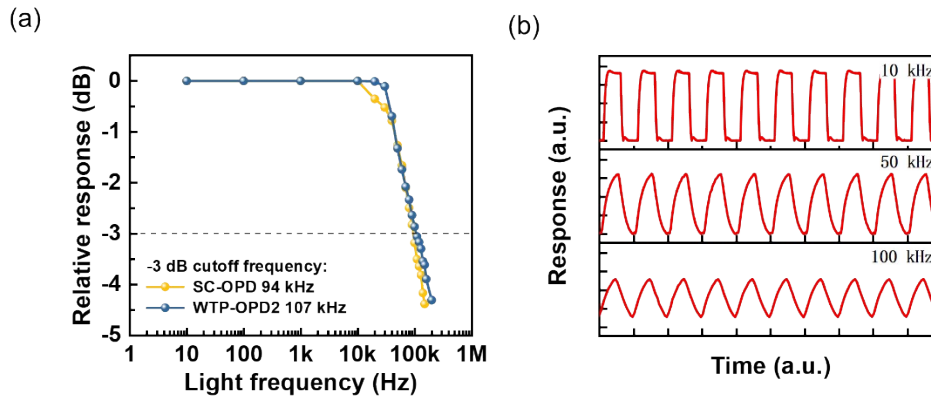

**Figure S4.** (a) Comparison of the  $-3$  dB cutoff frequencies between WTP-OPD2 and SC-OPD; (b) Schematic illustration of the photoresponse variation of the device with increasing light modulation frequency

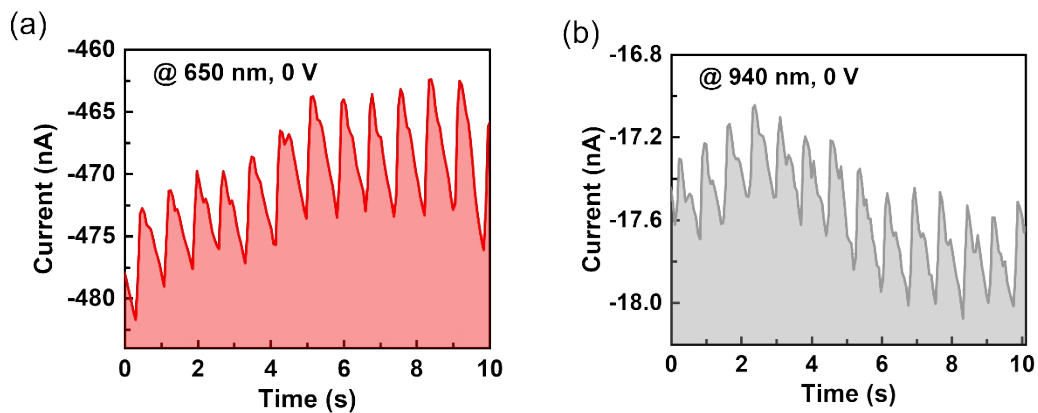

**Figure S5.** Device response under (a) 650 nm and (b) 940 nm illumination.

Table S1. Parameters of the testing liquids of water and diiodomethane.

| Liquid        | Dispersion force [ $V_L^d$ ] | Polar force [ $V_L^p$ ] | Surface energy [ $V_L$ ] |
|---------------|------------------------------|-------------------------|--------------------------|
| Water         | 21.8                         | 51.0                    | 72.8                     |
| Diiodomethane | 50.8                         | 0.0                     | 50.8                     |

Table S2. The contact angle and surface energy of different materials.

| Materials      | Water contact Angle(°) | Diiodomethane contact Angle(°) | Surface energy (mN/m) |
|----------------|------------------------|--------------------------------|-----------------------|
| CuSCN          | 39.7                   | 28.5                           | 66.37                 |
| WTP -PM6:L8-BO | 91.1                   | 50.5                           | 35.39                 |
| SC- PM6:L8-BO  | 104.6                  | 62.4                           | 27.36                 |

## The surface energy and interfacial energy calculations

The surface energy is calculated by using the following equation:

$$V_L = V_L^d + V_L^p$$

(1)

$$1 + \cos\theta = 2\left(\sqrt{V_L^d} \cdot \frac{\sqrt{V_L^d}}{V_L} + \sqrt{V_L^p} \cdot \frac{\sqrt{V_L^p}}{V_L}\right)$$

(2)

where  $V_L$  represents pure material surface energy,  $V^d$  and  $V^p$  are dispersion force and polarity force. Surface energy ( $V_L$ ) was determined by the contact angles of the testing liquids of water and diiodomethane, and the parameters of the testing liquids as Table 1 and 2 as shown above. In light of the surface energy of two different materials, interfacial energy between two different materials can be determined according to the equation below:

$$V_{A-B} = V_A + V_B - 4\left(\frac{V_A^d \cdot V_B^d}{V_A^d + V_B^d} + \frac{V_A^p \cdot V_B^p}{V_A^p + V_B^p}\right)$$

(3)

where  $V_A$  and  $V_B$  represent the surface energy of sample A and sample B, respectively;

$V_A^d$  and  $V_B^d$  are dispersion forces of sample A and sample B, respectively;  $V_A^p$  and  $V_B^p$  are polarity forces of sample A and sample B, respectively.
